# Supplementary material
Source: PubMed Central journal article supplement (PMC5752845)
Supplement: cr2017149x2.pdf [file cr2017149x2.pdf]

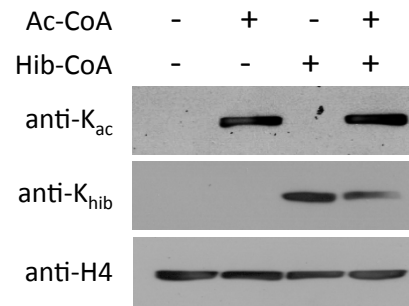

**Supplementary information, Figure S2** Competition assay of Tip60's acyltransferase activity towards Acetyl-CoA and 2-Hydroxyisobutyryl-CoA.
