# Supplementary material
Source: PubMed Central journal article supplement (PMC5752845)
Supplement: cr2017149x3.pdf [file cr2017149x3.pdf]

A

MS/MS Fragmentation of GKGGKGLGKGGAKR  
Match to Query 170: 1523.885448 from(762.950000,2+)

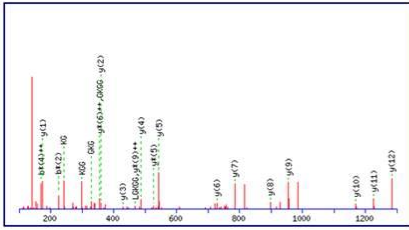

Monoisotopic mass of neutral peptide M<sub>r</sub>(calc): 1523.88  
 Variable modifications:  
 K2 : Propionyl (K)  
 K5 : hydroxy-Butanoyl (K)  
 K9 : Propionyl (K)  
 K13 : Propionyl (K)  
 Ions Score: 83 Expect: 1.3e-006  
 Matches (Bold Red): 31/259 fragment ions using 37 most intense peaks

| #  | Immon. | a       | a <sup>++</sup> | a <sup>+</sup> | a <sup>+++</sup> | b             | b <sup>++</sup> | b <sup>+</sup> | b <sup>+++</sup> | Seq. | y              | y <sup>++</sup> | y <sup>+</sup> | y <sup>+++</sup> | #  |
|----|--------|---------|-----------------|----------------|------------------|---------------|-----------------|----------------|------------------|------|----------------|-----------------|----------------|------------------|----|
| 1  | 30.03  | 30.03   | 15.52           |                |                  | 58.03         | 29.52           |                |                  | G    |                |                 |                |                  | 14 |
| 2  | 157.13 | 214.15  | 107.58          | 197.13         | 99.07            | <b>242.15</b> | 121.58          | <b>225.12</b>  | 113.07           | K    | 1467.86        | 734.44          | 1450.84        | 725.92           | 13 |
| 3  | 30.03  | 271.18  | 136.09          | 254.15         | 127.58           | <b>299.17</b> | 150.09          | 282.14         | 141.58           | G    | <b>1283.74</b> | 642.38          | 1266.72        | 633.86           | 12 |
| 4  | 30.03  | 328.20  | 164.60          | 311.17         | 156.09           | <b>356.19</b> | 178.60          | 339.17         | <b>170.09</b>    | G    | <b>1226.72</b> | 613.86          | 1209.69        | 605.35           | 11 |
| 5  | 187.14 | 542.33  | 271.67          | 525.30         | 263.16           | 570.32        | 285.67          | 553.30         | 277.15           | K    | <b>1169.70</b> | 585.35          | 1152.67        | 576.84           | 10 |
| 6  | 30.03  | 599.35  | 300.18          | 582.32         | 291.67           | 627.35        | 314.18          | 610.32         | 305.66           | G    | <b>985.58</b>  | 478.29          | 938.54         | <b>469.77</b>    | 9  |
| 7  | 86.10  | 712.44  | 356.72          | 695.41         | 348.21           | 740.43        | 370.72          | 723.40         | 362.21           | L    | <b>898.55</b>  | 449.78          | 881.52         | 441.26           | 8  |
| 8  | 30.03  | 769.46  | 385.23          | 752.43         | 376.72           | 797.45        | 399.23          | 780.43         | 390.72           | G    | <b>785.46</b>  | 393.24          | 768.44         | 384.72           | 7  |
| 9  | 157.13 | 953.58  | 477.29          | 936.55         | 468.78           | 981.57        | 491.29          | 964.55         | 482.78           | K    | <b>728.44</b>  | 364.72          | 711.41         | <b>356.21</b>    | 6  |
| 10 | 30.03  | 1010.60 | 505.80          | 993.57         | 497.29           | 1038.59       | 519.80          | 1021.57        | 511.29           | G    | <b>544.32</b>  | 272.66          | <b>527.29</b>  | 264.15           | 5  |
| 11 | 30.03  | 1067.62 | 534.31          | 1050.59        | 525.80           | 1095.62       | 548.31          | 1078.59        | 539.80           | G    | <b>487.30</b>  | 244.15          | 470.27         | 235.64           | 4  |
| 12 | 44.05  | 1138.66 | 569.83          | 1121.63        | 561.32           | 1166.65       | 583.83          | 1149.63        | 575.32           | A    | <b>430.28</b>  | 215.64          | 413.25         | 207.13           | 3  |
| 13 | 157.13 | 1322.78 | 661.89          | 1305.75        | 653.38           | 1350.77       | 675.89          | 1333.75        | 667.38           | K    | <b>359.24</b>  | 180.12          | 342.21         | 171.61           | 2  |
| 14 | 129.11 |         |                 |                |                  |               |                 |                |                  | R    | <b>175.12</b>  | 88.06           | 158.09         | 79.55            | 1  |

B

MS/MS Fragmentation of GKGGKGLGKGGAKR  
Match to Query 173: 1523.885448 from(762.950000,2+)

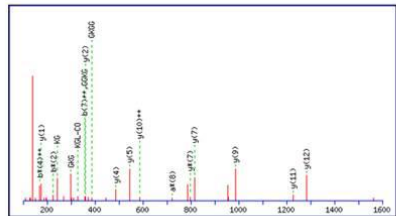

Monoisotopic mass of neutral peptide M<sub>r</sub>(calc): 1523.88  
 Variable modifications:  
 K2 : Propionyl (K)  
 K5 : Propionyl (K)  
 K9 : hydroxy-Butanoyl (K)  
 K13 : Propionyl (K)  
 Ions Score: 51 Expect: 0.0021  
 Matches (Bold Red): 27/259 fragment ions using 27 most intense peaks

| #  | Immon. | a       | a <sup>++</sup> | a <sup>+</sup> | a <sup>+++</sup> | b             | b <sup>++</sup> | b <sup>+</sup> | b <sup>+++</sup> | Seq. | y              | y <sup>++</sup> | y <sup>+</sup> | y <sup>+++</sup> | #  |
|----|--------|---------|-----------------|----------------|------------------|---------------|-----------------|----------------|------------------|------|----------------|-----------------|----------------|------------------|----|
| 1  | 30.03  | 30.03   | 15.52           |                |                  | 58.03         | 29.52           |                |                  | G    |                |                 |                |                  | 14 |
| 2  | 157.13 | 214.15  | 107.58          | 197.13         | 99.07            | <b>242.15</b> | 121.58          | <b>225.12</b>  | 113.07           | K    | 1467.86        | 734.44          | 1450.84        | 725.92           | 13 |
| 3  | 30.03  | 271.18  | 136.09          | 254.15         | 127.58           | <b>299.17</b> | 150.09          | 282.14         | 141.58           | G    | <b>1283.74</b> | 642.38          | 1266.72        | 633.86           | 12 |
| 4  | 30.03  | 328.20  | 164.60          | 311.17         | 156.09           | <b>356.19</b> | 178.60          | 339.17         | <b>170.09</b>    | G    | <b>1226.72</b> | 613.86          | 1209.69        | 605.35           | 11 |
| 5  | 157.13 | 512.32  | 256.66          | 495.29         | 248.15           | 540.31        | 270.66          | 523.29         | 262.15           | K    | 1169.70        | <b>585.35</b>   | 1152.67        | 576.84           | 10 |
| 6  | 30.03  | 569.34  | 285.17          | 552.31         | 276.66           | 597.34        | <b>299.17</b>   | 580.31         | 290.66           | G    | <b>985.58</b>  | 493.29          | 968.55         | 484.78           | 9  |
| 7  | 86.10  | 682.42  | 341.72          | 665.40         | 333.20           | 710.42        | <b>355.71</b>   | 693.39         | 347.20           | L    | 928.56         | 464.78          | 911.53         | 456.27           | 8  |
| 8  | 30.03  | 739.45  | 370.23          | <b>722.42</b>  | 361.71           | 767.44        | 384.22          | 750.41         | 375.71           | G    | <b>815.47</b>  | 408.24          | <b>798.45</b>  | 399.73           | 7  |
| 9  | 187.14 | 953.58  | 477.29          | 936.55         | 468.78           | 981.57        | 491.29          | 964.55         | 482.78           | K    | 758.45         | 379.73          | 741.43         | 371.22           | 6  |
| 10 | 30.03  | 1010.60 | 505.80          | 993.57         | 497.29           | 1038.59       | 519.80          | 1021.57        | 511.29           | G    | <b>544.32</b>  | 272.66          | 527.29         | 264.15           | 5  |
| 11 | 30.03  | 1067.62 | 534.31          | 1050.59        | 525.80           | 1095.62       | 548.31          | 1078.59        | 539.80           | G    | <b>487.30</b>  | 244.15          | 470.27         | 235.64           | 4  |
| 12 | 44.05  | 1138.66 | 569.83          | 1121.63        | 561.32           | 1166.65       | 583.83          | 1149.63        | 575.32           | A    | 430.28         | 215.64          | 413.25         | 207.13           | 3  |
| 13 | 157.13 | 1322.78 | 661.89          | 1305.75        | 653.38           | 1350.77       | 675.89          | 1333.75        | 667.38           | K    | <b>359.24</b>  | 180.12          | 342.21         | 171.61           | 2  |
| 14 | 129.11 |         |                 |                |                  |               |                 |                |                  | R    | <b>175.12</b>  | 88.06           | 158.09         | 79.55            | 1  |

C

MS/MS Fragmentation of GKGKGLGKGGAKR  
Match to Query 167: 1523.885448 from(762.950000,2+)

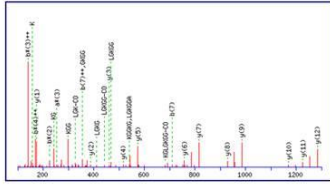

Monoisotopic mass of neutral peptide M<sub>r</sub>(calc): 1523.88  
Variable modifications:  
K2 : Propionyl (K)  
K5 : Propionyl (K)  
K8 : Propionyl (K)  
K13 : hydroxy-Butanoyl (K)  
Ions Score: 70 Expect: 2.9e-005  
Matches (bold red): 59/262 fragment ions using 54 most intense peaks

| #  | Immun.        | a             | a <sup>++</sup> | a <sup>*</sup> | a <sup>+++</sup> | b             | b <sup>++</sup> | b <sup>*</sup> | b <sup>+++</sup> | Seq. | y              | y <sup>++</sup> | y <sup>*</sup> | y <sup>+++</sup> | #  |
|----|---------------|---------------|-----------------|----------------|------------------|---------------|-----------------|----------------|------------------|------|----------------|-----------------|----------------|------------------|----|
| 1  | 30.03         | 30.03         | 15.52           |                |                  |               | 58.03           | 29.52          |                  | G    |                |                 |                |                  | 14 |
| 2  | <b>157.13</b> | 214.15        | 107.58          | 197.13         | 99.07            | <b>242.15</b> | 121.58          | <b>225.12</b>  | 113.07           | K    | 1467.86        | 734.44          | 1450.84        | 725.92           | 13 |
| 3  | 30.03         | 271.18        | 136.09          | <b>254.15</b>  | 127.58           | <b>299.17</b> | 150.09          | 282.14         | <b>141.58</b>    | G    | <b>1283.74</b> | 642.38          | 1266.72        | 633.86           | 12 |
| 4  | 30.03         | 328.20        | 164.60          | 311.17         | 156.09           | <b>356.19</b> | 178.60          | 339.17         | <b>170.09</b>    | G    | <b>1226.72</b> | 613.86          | 1209.69        | 605.35           | 11 |
| 5  | <b>157.13</b> | 512.32        | 256.66          | 495.29         | 248.15           | <b>540.31</b> | 270.66          | 523.29         | 262.15           | K    | <b>1169.70</b> | 585.35          | 1152.67        | 576.84           | 10 |
| 6  | 30.03         | 569.34        | 285.17          | 552.31         | 276.66           | 597.34        | <b>299.17</b>   | 580.31         | 290.66           | G    | <b>985.58</b>  | 493.29          | 968.55         | 484.78           | 9  |
| 7  | 86.10         | <b>682.42</b> | 341.72          | 665.40         | 333.20           | <b>710.42</b> | <b>355.71</b>   | 693.39         | 347.20           | L    | <b>928.56</b>  | 464.78          | 911.53         | 456.27           | 8  |
| 8  | 30.03         | 739.45        | 370.23          | 722.42         | 361.71           | 767.44        | 384.22          | 750.41         | 375.71           | G    | <b>815.47</b>  | 408.24          | 798.45         | 399.73           | 7  |
| 9  | <b>157.13</b> | 923.57        | 462.29          | 906.54         | 453.77           | 951.56        | 476.28          | 934.54         | 467.77           | K    | <b>758.45</b>  | 379.73          | 741.43         | 371.22           | 6  |
| 10 | 30.03         | 980.59        | 490.80          | 963.56         | 482.28           | 1008.58       | 504.80          | 991.56         | 496.28           | G    | <b>574.33</b>  | 287.67          | 557.30         | 279.16           | 5  |
| 11 | 30.03         | 1037.61       | 519.31          | 1020.58        | 510.80           | 1065.61       | 533.31          | 1048.58        | 524.79           | G    | <b>517.31</b>  | 259.16          | 500.28         | 250.64           | 4  |
| 12 | 44.05         | 1108.65       | 554.83          | 1091.62        | 546.31           | 1136.64       | 568.82          | 1119.62        | 560.31           | A    | <b>460.29</b>  | 230.65          | 443.26         | 222.13           | 3  |
| 13 | 187.14        | 1322.78       | 661.89          | 1305.75        | 653.38           | 1350.77       | 675.89          | 1333.75        | 667.38           | K    | <b>389.25</b>  | 195.13          | 372.22         | 186.62           | 2  |
| 14 | 129.11        |               |                 |                |                  |               |                 |                |                  | R    | <b>175.12</b>  | 88.06           | 158.09         | 79.55            | 1  |

D

MS/MS Fragmentation of DNIQGITKPAIR  
Match to Query 14944: 1410.785448 from(706.400000,2+)

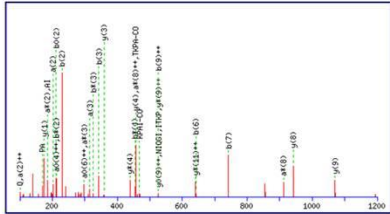

Monoisotopic mass of neutral peptide M<sub>r</sub>(calc): 1410.78  
Variable modifications:  
K8 : hydroxy-Butanoyl (K)  
Ions Score: 34 Expect: 0.11  
Matches (bold red): 34/263 fragment ions using 35 most intense peaks

| #  | Immun.        | a             | a <sup>++</sup> | a <sup>*</sup> | a <sup>+++</sup> | a <sup>0</sup> | a <sup>0++</sup> | b             | b <sup>++</sup> | b <sup>*</sup> | b <sup>+++</sup> | b <sup>0</sup> | b <sup>0++</sup> | Seq. | y              | y <sup>++</sup> | y <sup>*</sup> | y <sup>+++</sup> | y <sup>0</sup> | y <sup>0++</sup> | #  |    |
|----|---------------|---------------|-----------------|----------------|------------------|----------------|------------------|---------------|-----------------|----------------|------------------|----------------|------------------|------|----------------|-----------------|----------------|------------------|----------------|------------------|----|----|
| 1  | 88.04         | 88.04         | 44.52           |                |                  | 70.03          | 35.52            | 116.03        | 58.52           |                |                  | 98.02          | 49.52            | D    |                |                 |                |                  |                |                  |    | 12 |
| 2  | 87.06         | <b>202.08</b> | <b>101.54</b>   | <b>185.06</b>  | 93.03            | 184.07         | 92.54            | <b>230.08</b> | 115.54          | <b>213.05</b>  | 107.03           | <b>212.07</b>  | 106.54           | N    | 1296.76        | 648.89          | 1279.74        | <b>640.37</b>    | 1278.75        | 639.88           | 11 |    |
| 3  | 86.10         | <b>315.17</b> | 158.09          | <b>298.14</b>  | 149.57           | 297.16         | 149.08           | <b>343.16</b> | 172.08          | <b>326.13</b>  | 163.57           | 325.15         | 163.08           | I    | 1182.72        | 591.86          | 1165.69        | 583.35           | 1164.71        | 582.86           | 10 |    |
| 4  | <b>101.07</b> | 443.22        | 222.12          | 426.20         | 213.60           | 425.21         | <b>215.11</b>    | 471.22        | 236.11          | <b>454.19</b>  | 227.60           | 453.21         | 227.11           | Q    | <b>1069.64</b> | 535.32          | 1052.61        | <b>526.81</b>    | 1051.63        | <b>526.32</b>    | 9  |    |
| 5  | 30.03         | 500.25        | 250.63          | 483.22         | 242.11           | 482.24         | 241.62           | 528.24        | 264.62          | 511.21         | 256.11           | 510.23         | 255.62           | G    | <b>941.58</b>  | 471.29          | 924.55         | 462.78           | 923.57         | 462.29           | 8  |    |
| 6  | 86.10         | 613.33        | 307.17          | 596.30         | 298.66           | 595.32         | <b>298.16</b>    | <b>641.33</b> | 321.17          | 624.30         | 312.65           | 623.31         | 312.16           | I    | 884.56         | 442.78          | 867.53         | 434.27           | 866.55         | 433.78           | 7  |    |
| 7  | 74.06         | 714.38        | 357.69          | 697.35         | 349.18           | 696.37         | 348.69           | <b>742.37</b> | 371.69          | 725.35         | 363.18           | 724.36         | 362.68           | T    | 771.47         | 386.24          | 754.45         | 377.73           | 753.46         | 377.23           | 6  |    |
| 8  | 187.14        | 928.51        | 464.76          | <b>911.48</b>  | <b>456.25</b>    | 910.50         | 455.75           | 956.50        | 478.76          | 939.48         | 470.24           | 938.49         | 469.75           | K    | 670.42         | 335.72          | 653.40         | 327.20           |                |                  | 5  |    |
| 9  | 70.07         | 1025.56       | 513.28          | 1008.54        | 504.77           | 1007.55        | 504.28           | 1053.56       | <b>527.28</b>   | 1036.53        | 518.77           | 1035.55        | 518.28           | P    | <b>456.29</b>  | 228.65          | <b>439.27</b>  | 220.14           |                |                  | 4  |    |
| 10 | 44.05         | 1096.60       | 548.80          | 1079.57        | 540.29           | 1078.59        | 539.80           | 1124.59       | 562.80          | 1107.57        | 554.29           | 1106.58        | 553.80           | A    | <b>359.24</b>  | 180.12          | 342.21         | 171.61           |                |                  | 3  |    |
| 11 | 86.10         | 1209.68       | 605.35          | 1192.66        | 596.83           | 1191.67        | 596.34           | 1237.68       | 619.34          | 1220.65        | 610.83           | 1219.67        | 610.34           | I    | 288.20         | 144.61          | 271.18         | 136.09           |                |                  | 2  |    |
| 12 | 129.11        |               |                 |                |                  |                |                  |               |                 |                |                  |                |                  | R    | <b>175.12</b>  | 88.06           | 158.09         | 79.55            |                |                  | 1  |    |

Supplementary information, Figure S3 Spectra of the H4K<sub>hib</sub> peptides identified in the *in vitro* assay.

The reaction mixture was chemically propionylated (*Nat Chem Biol*, 2014, 10,365), tryptic digested, and subjected to MS/MS analysis. (A) Spectrum of H4K8<sub>hib</sub> peptide. (B) Spectrum of H4K12<sub>hib</sub> peptide. (C) Spectrum of H4K16<sub>hib</sub> peptide. (D) Spectrum of H4K31<sub>hib</sub> peptide.
