# Supplementary material
Source: PubMed Central journal article supplement (PMC5752845)
Supplement: cr2017149x7.pdf [file cr2017149x7.pdf]

**Supplementary information, Table S1** The ratios of quantifiable histone K<sub>hib</sub> sites between HDAC3 overexpressed 293T cells and control 293T cells.

The control 293T cells were transfected with an empty vector PCDNA3.1 in DMEM, and labeled with <sup>13</sup>C<sub>6</sub><sup>15</sup>N<sub>2</sub>-lysine, while the HDAC3 overexpressed 293T cells were transferred with a vector encoding PCDNA3.1-FLAG-HDAC3 in DMEM, and labeled with <sup>12</sup>C<sub>6</sub>-lysine. Two pools of cells were harvested and the extracted proteins were mixed, digested, enriched with anti-K<sub>hib</sub> antibody, and then analyzed by HPLC-MS/MS. All the K<sub>hib</sub> site ratios were normalized by the quantified histone proteins expression levels.

| <b>K<sub>hib</sub> sites</b> | <b>Peptide sequence</b>           | <b>Normalized Ratio<br/>L(HDAC3 overexpression)/H(control)</b> |
|------------------------------|-----------------------------------|----------------------------------------------------------------|
| H1.2K74                      | ALAAAGYDVEK <sub>hib</sub> NNSR   | 0.70                                                           |
| H1.2K74                      | GTLVQTK <sub>hib</sub> GTGASGSFK  | 0.60                                                           |
| H2AK95                       | NDEELNK <sub>hib</sub> LLGK       | 0.67                                                           |
| H2BK109                      | LLLPGELAK <sub>hib</sub> HAVSEGTK | 0.58                                                           |
| H2BK5                        | PEPSK <sub>hib</sub> SAPAPK       | 1.15                                                           |
| H2BK44                       | K <sub>hib</sub> ESYSIYVYK        | 0.61                                                           |
| H3K18                        | K <sub>hib</sub> QLATK(ac)AAR     | 0.66                                                           |
| H3K56                        | YQK <sub>hib</sub> STELLIR        | 0.67                                                           |
| H3K79                        | EIAQDFK <sub>hib</sub> TDLR       | 0.82                                                           |
| H3K122                       | VTIMPK <sub>hib</sub> DIQLAR      | 0.63                                                           |
| H4K31                        | DNIQGITK <sub>hib</sub> PAIR      | 0.60                                                           |
| H4K77                        | DAVTYTEHAK <sub>hib</sub> R       | 0.52                                                           |
| H4K91                        | TVTAM(ox)DVVYALK <sub>hib</sub> R | 0.58                                                           |
